# Supplementary material for: The Genetic Requirements for Fast and Slow Growth in Mycobacteria
Source: PLoS One. 2009 Apr 28;4(4):e5349. doi: 10.1371/journal.pone.0005349 (PMC2685279; doi:10.1371/journal.pone.0005349)
Supplement: Dataset S3 — List of significant (pfp<0.1)negatively selected M. bovis BCG mutants at fast (td = 23 h, D = 0.03 h) growth rate. (0.03 MB XLS) [file pone.0005349.s003.xls]

## Sheet: Sheet1
Dataset S3. List of negatively selected M. bovis BCG mutants at fast growth rate
ORF	Gene Name	Function	Ratio	pfp
Rv0040c	Rv0040c	conserved hypothetical protein	0.9353	0.0114
Rv0079	Rv0079	hypothetical protein	0.9629	0.012
Rv0224c	Rv0224c	Probable methyltransferase	0.967	0.0461
Rv0341	Rv0341	conserved hypothetical protein	1.1664	0.0203
Rv0450c	mmpL4	conserved large membrane protein	0.6838	0.0497
Rv0491	regX3	two-component response regulator	0.6528	0.005
Rv0596c	Rv0596c	conserved hypothetical protein	0.6554	0.0209
Rv0642c	mmaA4	methoxymycolic acid synthase 4	0.8203	0.0113
Rv0947c	Rv0947c	similarity with A85C_MYCTU P31953	0.7599	0.0325
Rv1109c	Rv1109c	hypothetical protein	0.7194	0.031
Rv1127c	ppdK	similar to pyruvate, phosphate dikinase	0.8819	0.0722
Rv1266c	pknH	serine-threonine protein kinase	0.8384	0.0537
Rv1567c	Rv1567c	hypothetical protein	0.8638	0.0647
Rv1590	Rv1590	conserved hypothetical protein	0.935	0.0679
Rv1644	tsnR	putative 23S rRNA methyltransferase	0.7246	0.0097
Rv1734c	Rv1734c	hypothetical protein	1.1858	0.0092
Rv1818c	PE PGRS	PE_PGRS-family protein	0.8329	0.0325
Rv1860	modD	precursor of Apa (45/47 kD secreted protein)	0.677	0.0106
Rv1892	Rv1892	hypothetical protein	0.8179	0.0088
Rv1962c	Rv1962c	conserved hypothetical protein	0.7248	0.0103
Rv2048c	pks12	polyketide synthase (erythronolide synthase-like)	0.9608	0.0517
Rv2123	PPE37	PPE-family protein	0.7564	0.0199
Rv2288	Rv2288	hypothetical protein	0.6258	0.011
Rv2638	Rv2638	conserved hypothetical protein	0.6546	0.008
Rv2639c	Rv2639c	conserved hypothetical protein	0.9742	0.0797
Rv2738c	Rv2738c	conserved hypothetical protein	0.9982	0.0444
Rv2913c	Rv2913c	probable D-amino acid aminohydrolase	1.0431	0.0211
Rv2924c	fpg	formamidopyrimidine-DNA glycosylase	0.835	0.0448
Rv3892c	PPE69	PPE-family protein	0.7989	0.0123
